# Supplementary material for: Stable co-production of olefins and aromatics from ethane over Co2+-exchanged HZSM-5 zeolite
Source: Royal Society of Chemistry journal article supplement (doi:10.1039/d2cy00664b), 2022-01-01
Supplement: d2cy00664b1.pdf [file d2cy00664b1.pdf]

## Supporting Information

### **Stable co-production of ethylene and aromatics from ethane over Co<sup>2+</sup>-exchanged HZSM-5 zeolite**

Wenjin Hu, Yuebing Xu\*, Jian Xin, Bing Liu, Feng Jiang, Xiaohao Liu\*

*Department of Chemical Engineering, School of Chemical and Material Engineering,  
Jiangnan University, 214122 Wuxi, China*

\* Corresponding author: E-mail address:

[xuyuebing@jiangnan.edu.cn](mailto:xuyuebing@jiangnan.edu.cn) (Y.B. Xu); [liuxh@jiangnan.edu.cn](mailto:liuxh@jiangnan.edu.cn) (X.H. Liu).

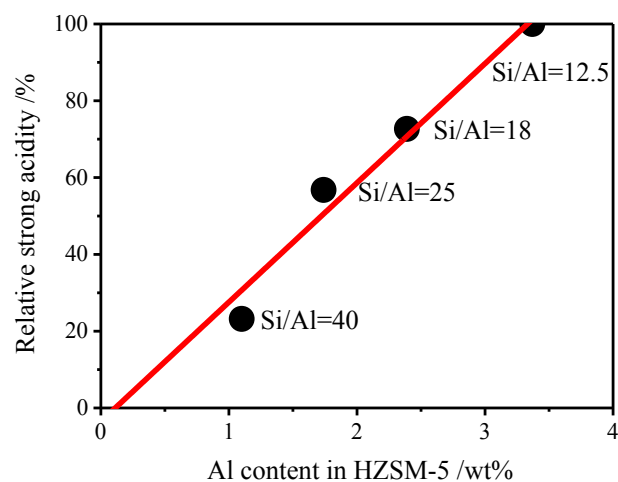

**Fig. S1.** The relative strong acidity in parent HZSM-5 zeolites as a function of Al content in zeolite based on that in the HZSM-5 (Si/Al = 12.5) supposed to be 100%.

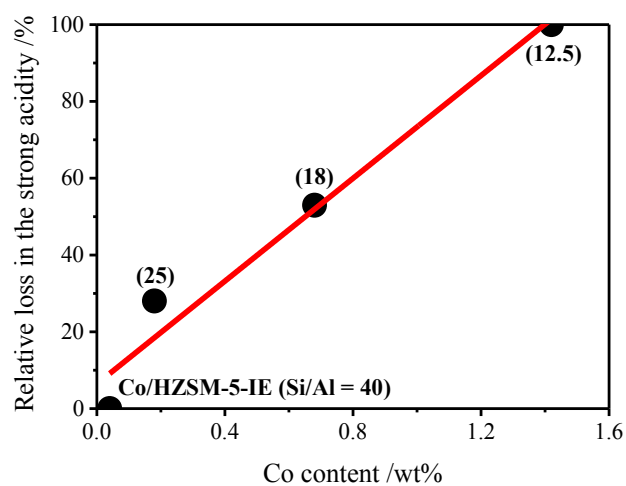

**Fig. S2.** The relative loss in the strong acidity in the Co/HZSM-5-IE catalysts as a function of Co content based on the loss in the Co/HZSM-5-IE (Si/Al = 12.5) supposed to be 100%.

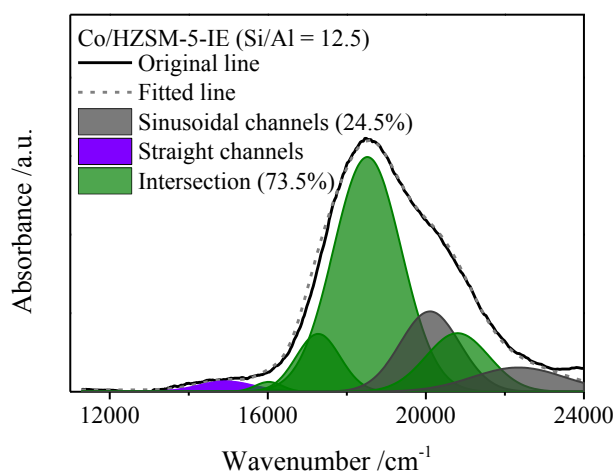

**Fig. S3.** Deconvolution of UV-vis DR spectrum of Co/HZSM-5-IE (Si/Al = 12.5) catalyst sample.

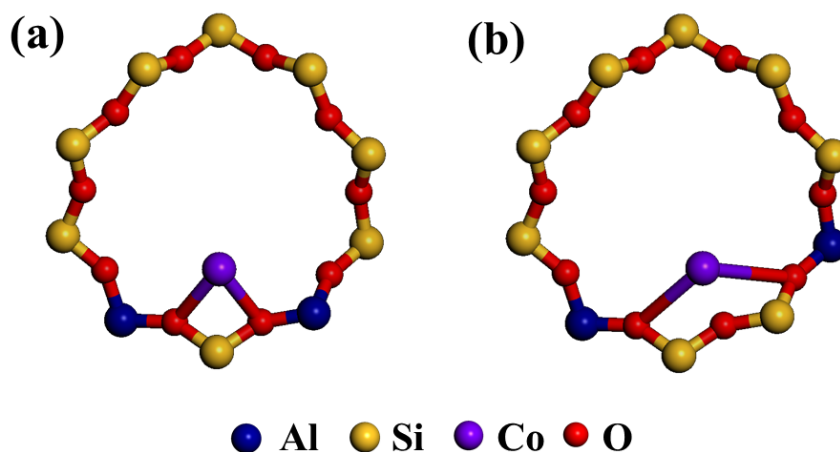

**Fig. S4.** The schematic location of Co ions in the ion-exchanged Co/HZSM-5 catalyst: (a) possibly existed in a zeolite with a very low Si/Al ratio; (b) commonly existed, especially, in a zeolite with a high Si/Al ratio.

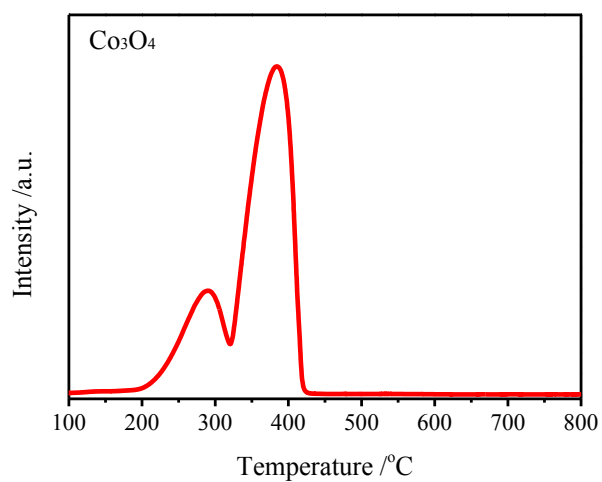

**Fig. S5.** H<sub>2</sub>-TPR profile of a synthesized Co<sub>3</sub>O<sub>4</sub> compound.

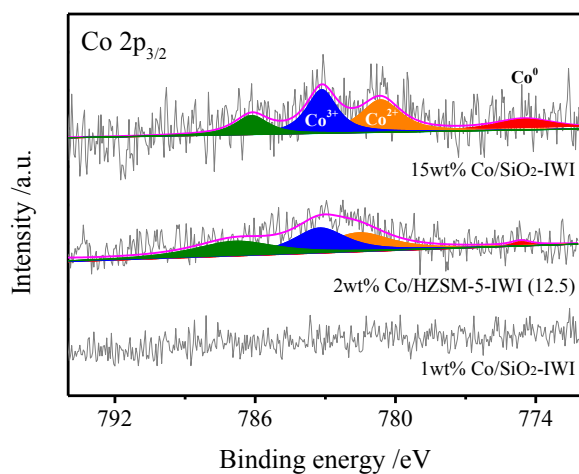

**Fig. S6.** XPS spectra of 1 wt%, 15 wt% Co/SiO<sub>2</sub>-IWI and 2 wt% Co/HZSM-5-IWI (Si/Al = 12.5) catalysts reduced by H<sub>2</sub> at 600 °C for 30 min.

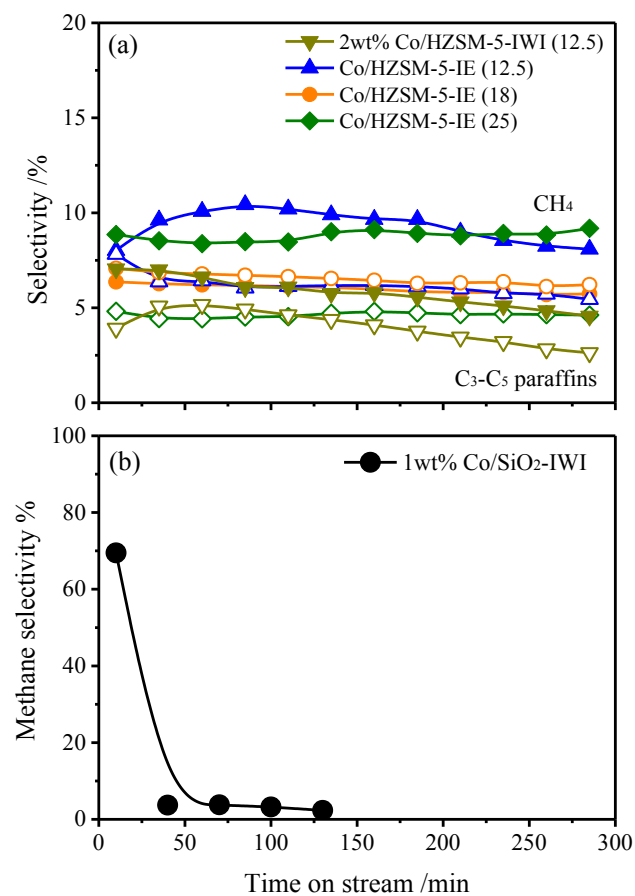

**Fig. S7.** The selectivities to paraffins for Co-based catalysts. Reaction conditions: 0.3 g of catalysts, 90% $\text{C}_2\text{H}_6/\text{N}_2$ , 15 mL/min, 600 °C, pressure at 0.1 MPa.

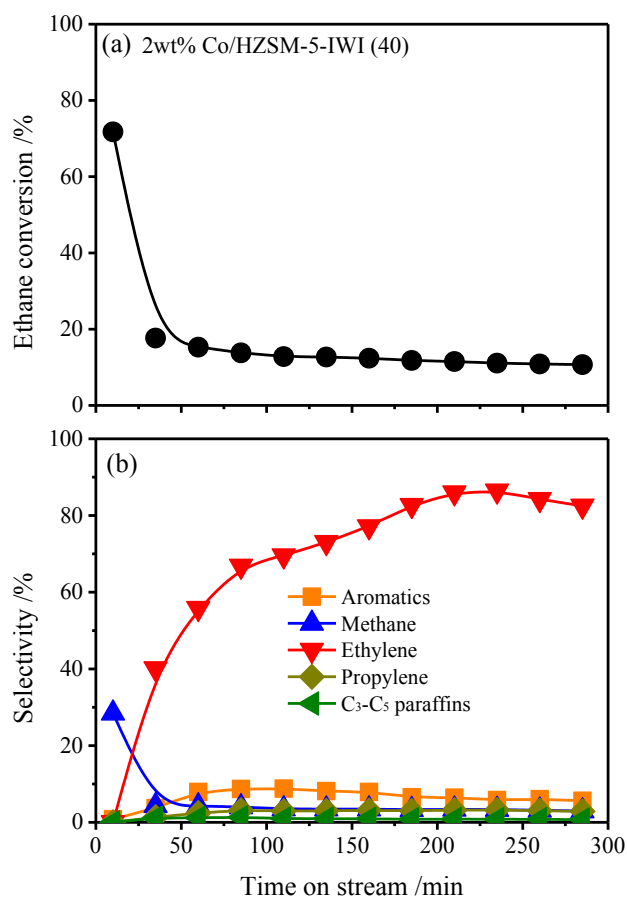

**Fig. S8.** Time-dependence of  $C_2H_6$  conversion and the selectivity to various hydrocarbons for the 2 wt% Co/HZSM-5-IWI (40) catalysts at 600 °C, 0.1 MPa, 3000 mL/g/h and 90% $C_2H_6$ /10% $N_2$ .

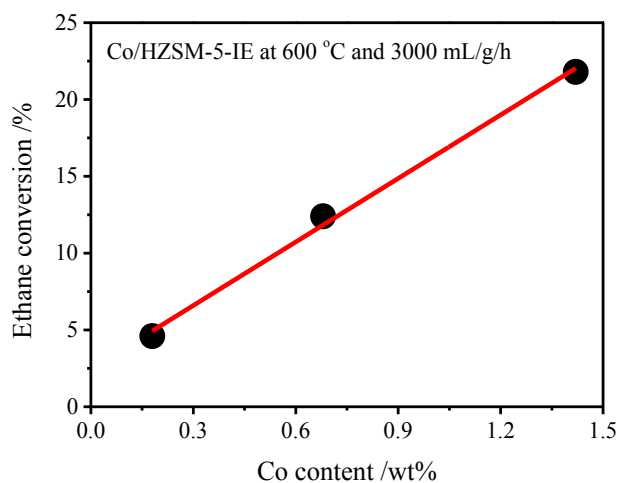

**Fig. S9.** The plotting of ethane conversion as a function of Co content in the Co-exchanged HZSM-5 catalyst. Reaction condition: 600 °C, 0.1 MPa, 3000 mL/g/h and 90% $C_2H_6$ /10% $N_2$ .

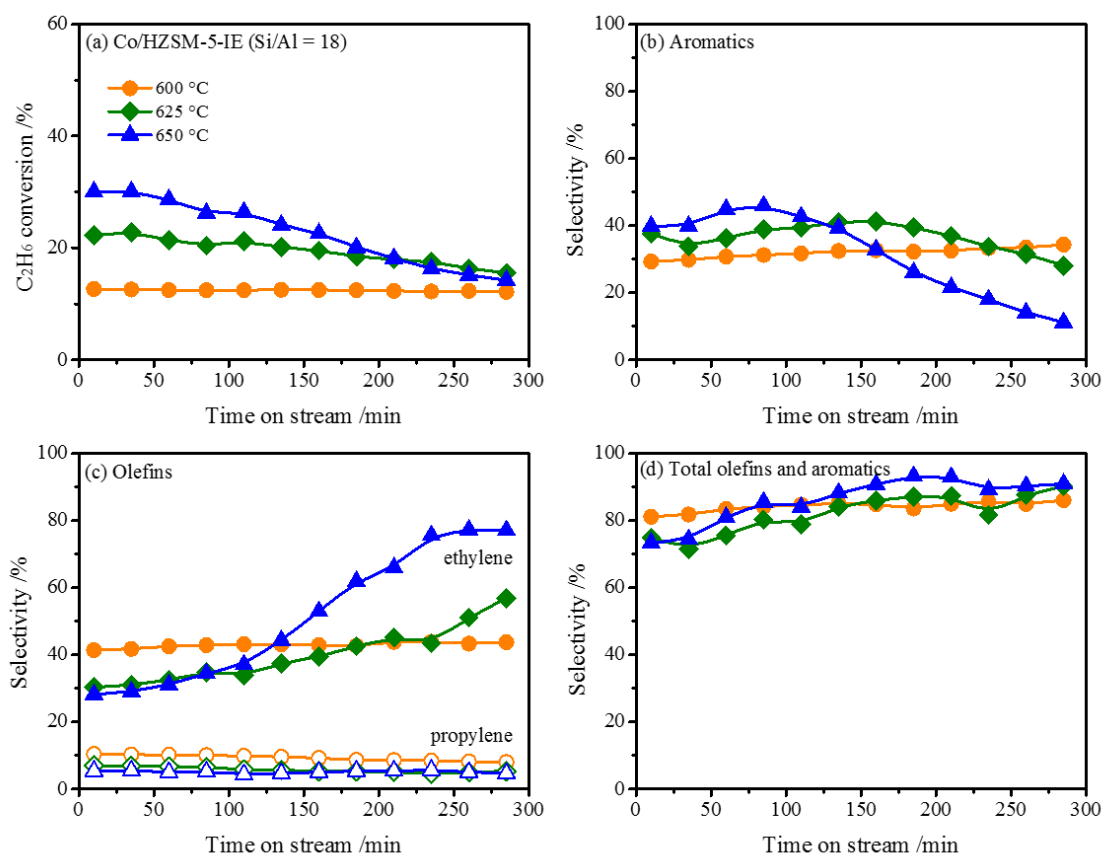

**Fig. S10.** The C<sub>2</sub>H<sub>6</sub> conversion and selectivity to olefins and aromatics over Co/HZSM-5-IE (Si/Al = 18) catalyst at various reaction temperatures (600-650 °C) and 3000 mL/g/h.

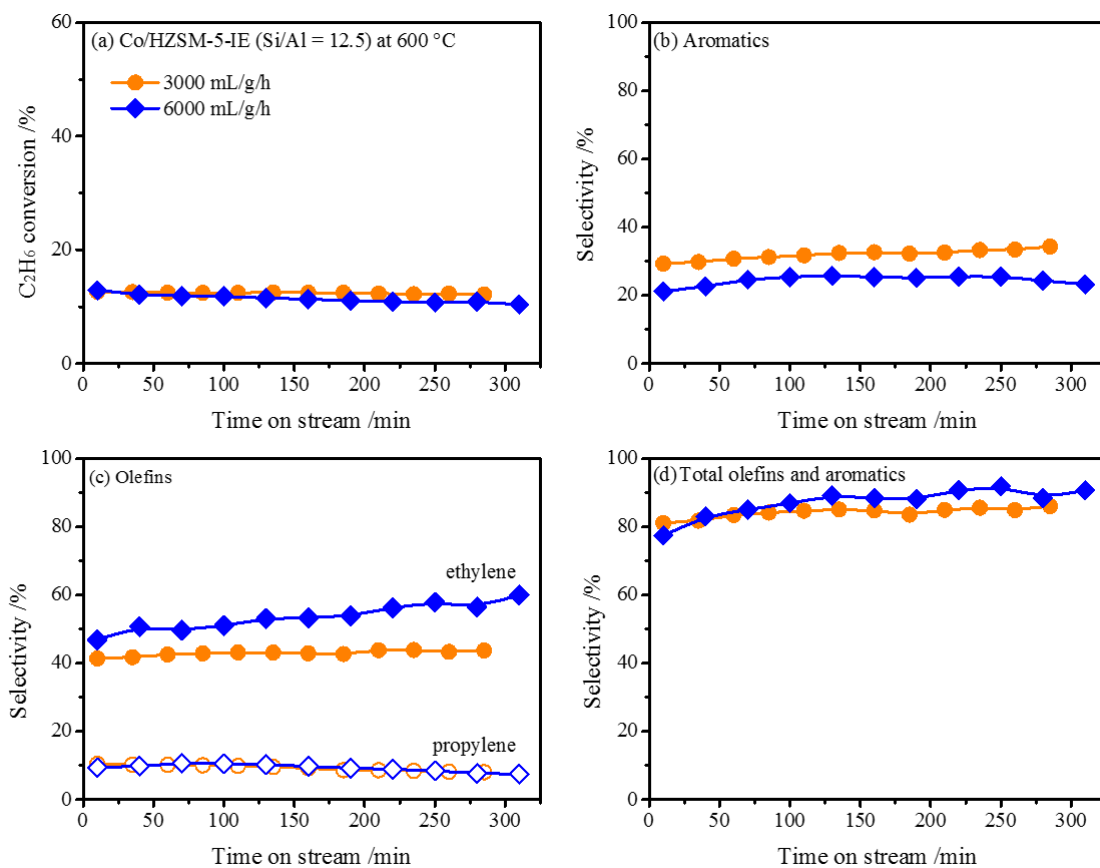

**Fig. S11.** The C<sub>2</sub>H<sub>6</sub> conversion and selectivity to olefins and aromatics over Co/HZSM-5-IE (Si/Al = 18) catalyst at 600 °C and two space velocities of 3000 and 6000 mL/g/h.



**Table S1.** Ethane conversion and products selectivities over Co/HZSM-5 catalysts

| Catalyst           | Ethane<br>conv. <sup>a)</sup><br>/% | Selectivity <sup>a)</sup> /% |                               |                               |                               |                                |      |      |     |     |      |         |                    | Olefins<br>/% | Aromatics<br>/% |
|--------------------|-------------------------------------|------------------------------|-------------------------------|-------------------------------|-------------------------------|--------------------------------|------|------|-----|-----|------|---------|--------------------|---------------|-----------------|
|                    |                                     | CH <sub>4</sub>              | C <sub>2</sub> H <sub>4</sub> | C <sub>3</sub> H <sub>6</sub> | C <sub>3</sub> H <sub>8</sub> | C <sub>4</sub> -C <sub>6</sub> | Benz | Toul | Xyl | TMB | Naph | Me-Naph | Coke <sup>b)</sup> |               |                 |
| Co/ZSM-5-IE (12.5) | 21.5                                | 9.3                          | 40.1                          | 4.4                           | 3.1                           | 2.0                            | 12.8 | 13.9 | 3.0 | 1.3 | 3.5  | 3.6     | 3.1                | 44.5          | 38.1            |
| Co/ZSM-5-IE (18)   | 12.4                                | 6.0                          | 42.9                          | 8.6                           | 3.1                           | 2.9                            | 14.3 | 11.3 | 2.8 | 0.7 | 1.5  | 1.3     | 4.6                | 51.5          | 31.9            |
| Co/ZSM-5-IE (25)   | 4.6                                 | 8.7                          | 54.0                          | 11.6                          | 2.3                           | 2.4                            | 4.2  | 3.2  | 0.6 | 0.2 | 3.1  | 0       | 9.7                | 65.6          | 11.3            |

<sup>a)</sup> The feed is 10%N<sub>2</sub>/90%C<sub>2</sub>H<sub>6</sub> and the reaction lasted for 300 min at 600 °C and 0.1 MPa.

<sup>b)</sup> The selectivity to coke was obtained by subtraction method and carbon balance was confirmed to be 95-105% according to the coke amount in the spent samples.
